# Supplementary material for: Communication of COVID-19 Misinformation on Social Media by Physicians in the US
Source: PubMed Central journal article supplement (PMC10427940; doi:10.1001/jamanetworkopen.2023.28928), 2023-08-15
Supplement: jamanetwopen-e2328928-s001.pdf [file jamanetwopen-e2328928-s001.pdf]

## Supplementary Online Content

Sule S, DaCosta MC, DeCou E, Gilson C, Wallace K, Goff SL. Communication of COVID-19 misinformation on social media by physicians in the US. *JAMA Netw Open*. 2023;6(8):e2328928. doi:10.1001/jamanetworkopen.2023.28928

**eTable.** Misinformation vs Public Health Guidelines

**eReferences**

This supplementary material has been provided by the authors to give readers additional information about their work.

**eTable.** Misinformation vs Public Health Guidelines

| <b>Misinformation Type</b>          | <b>Public Health Guidelines</b>                                                                                                                                                                                                                                                                     |
|-------------------------------------|-----------------------------------------------------------------------------------------------------------------------------------------------------------------------------------------------------------------------------------------------------------------------------------------------------|
| Vaccine ineffectiveness             | <ul style="list-style-type: none"><li>• COVID-19 vaccines prevent serious illness, hospitalization, and death.<sup>1</sup></li><li>• Building immunity through vaccination is safer and more reliable than getting infected.<sup>1</sup></li></ul>                                                  |
| Vaccine risks                       | <ul style="list-style-type: none"><li>• The COVID-19 vaccines have been evaluated in several clinical trials and have met the FDA's rigorous scientific standards.<sup>2</sup></li><li>• Adverse events and side effects are rare.<sup>2</sup></li></ul>                                            |
| Promotion of unapproved medications | <ul style="list-style-type: none"><li>• The benefits of hydroxychloroquine in treating COVID-19 do not outweigh the risks.<sup>3</sup></li><li>• Ivermectin is not approved by the U.S. FDA to prevent or treat COVID-19 as there is insufficient data to prove its efficacy.<sup>4</sup></li></ul> |
| Mask ineffectiveness                | <ul style="list-style-type: none"><li>• Masking is a critical public health tool and reduces the spread of COVID-19.<sup>5</sup></li></ul>                                                                                                                                                          |
| Mask risks                          | <ul style="list-style-type: none"><li>• Masks are made from breathable material that do not restrict oxygen flow nor trap carbon dioxide.<sup>6</sup></li><li>• Masks have not been found to interfere with social development.<sup>7</sup></li></ul>                                               |

## eReferences

1. Benefits of Getting a COVID-19 Vaccine. Centers for Disease Control and Prevention. Published May 11, 2023. Accessed May 17, 2023. <https://www.cdc.gov/coronavirus/2019-ncov/vaccines/vaccine-benefits.html>
2. Safety of COVID-19 Vaccines. Centers for Disease Control and Prevention. Published March 7, 2023. Accessed May 19, 2023. <https://www.cdc.gov/coronavirus/2019-ncov/vaccines/safety/safety-of-vaccines.html>
3. Coronavirus disease (COVID-19): Hydroxychloroquine. Published March 28, 2023. Accessed May 17, 2023. [https://www.who.int/news-room/questions-and-answers/item/coronavirus-disease-\(covid-19\)-hydroxychloroquine](https://www.who.int/news-room/questions-and-answers/item/coronavirus-disease-(covid-19)-hydroxychloroquine)
4. Why You Should Not Use Ivermectin to Treat or Prevent COVID-19. *FDA*. Published online January 13, 2022. Accessed May 19, 2023. <https://www.fda.gov/consumers/consumer-updates/why-you-should-not-use-ivermectin-treat-or-prevent-covid-19>
5. Masks. Centers for Disease Control and Prevention. Published August 12, 2021. Accessed May 19, 2023. <https://www.cdc.gov/coronavirus/2019-ncov/prevent-getting-sick/masks.html>
6. Dickinson K, Guilbert T. Mask Mythbusters: Common Questions about Kids & Face Masks. HealthyChildren.org. Published March 24, 2022. Accessed May 17, 2023. [https://healthychildren.org/English/health-issues/conditions/COVID-19/Pages/Mask-Mythbusters.aspx?\\_gl=1\\*1m222uc\\*\\_ga\\*MTc4OTQ1OTUxMy4xNjg0MzUwODgw\\*\\_ga\\_FD9D3XZVQQ\\*MTY4NDM1MDg4MC4xLjAuMTY4NDM1MDg4MC4wLjAuMA..&\\_ga=2.239303875.1551239792.1684350880-1789459513.1684350880](https://healthychildren.org/English/health-issues/conditions/COVID-19/Pages/Mask-Mythbusters.aspx?_gl=1*1m222uc*_ga*MTc4OTQ1OTUxMy4xNjg0MzUwODgw*_ga_FD9D3XZVQQ*MTY4NDM1MDg4MC4xLjAuMTY4NDM1MDg4MC4wLjAuMA..&_ga=2.239303875.1551239792.1684350880-1789459513.1684350880)
7. Yum LD. Do Masks Delay Speech and Language Development? CHC Resource Library | CHC | Services for Mental Health and Learning Differences for Young Children, Teens and Young Adults | Palo Alto, San Jose, Ravenswood. Published February 15, 2022. Accessed May 17, 2023. <https://dev.chconline.org/resourcelibrary/do-masks-delay-speech-and-language-development/>
