# Supplementary material for: Communication of COVID-19 Misinformation on Social Media by Physicians in the US
Source: PubMed Central journal article supplement (PMC10427940; doi:10.1001/jamanetworkopen.2023.28928), 2023-08-15
Supplement: jamanetwopen-e2328928-s002.pdf [file jamanetwopen-e2328928-s002.pdf]

## Data Sharing Statement

Sule. Communication of COVID-19 Misinformation on Social Media by Physicians in the US. *JAMA Netw Open*. Published August 15, 2023. doi:10.1001/jamanetworkopen.2023.28928

### Data

**Data available:** Yes

**Data types:** Data (not involving human participants)

**How to access data:** Data are all publicly available.

**When available:** With publication

### Supporting Documents

**Document types:** None

### Additional Information

**Who can access the data:** Researchers whose proposed use of the data has been approved.

**Types of analyses:** For a specified purpose.

**Mechanisms of data availability:** Without investigator support, after approval of proposal.
